# Supplementary material for: Interneuron diversity in the human dorsal striatum
Source: PubMed Central journal article supplement (PMC11263574; doi:10.1038/s41467-024-50414-w), 2024-07-22
Supplement: 41467_2024_50414_MOESM3_ESM.pdf [file 41467_2024_50414_MOESM3_ESM.pdf]

## **Supplementary Data Legends**

**Supplementary Dataset 1.** Specimen information. Overview on human sample including information about origin, age, brain region and sequencing information. MADRC, Massachusetts Alzheimer's Disease Research Center (Charlstown, USA); NIH, Human Brain and Spinal Fluid Resource Center (Los Angeles, USA); PUKBB, Parkinson's UK Brain Bank at Imperial (London, UK); PMI, post-mortem interval.

**Supplementary Dataset 2.** Differential gene expression by interneuron class and subclass. Analysis performed at the cell level using a Wilcoxon rank-sum test with Benjamini-Hochberg p-value correction.

**Supplementary Dataset 3.** Differential gene expression by region. The analysis was conducted using a pseudo-bulk approach, aggregating cells by sample.

**Supplementary Dataset 4.** Weights assigned to genes on the factor analysis of the TAC3 and PTHLH subclasses.

**Supplementary Dataset 5.** Differential gene expression by interneuron class and subclass among neurotransmitter receptor genes and genes with ion channel activity. Analysis performed at the cell level using a Wilcoxon rank-sum test with Benjamini-Hochberg p-value correction.

**Supplementary Dataset 6.** Description of public datasets, number of nuclei filtered at each step of the analysis and number of nuclei per dataset.

**Supplementary Dataset 7.** QuPath thresholds and cutoffs used in the validation experiments.

**Supplementary Dataset 8.** Abbreviations used in the text.
