# Supplementary material for: Interneuron diversity in the human dorsal striatum
Source: PubMed Central journal article supplement (PMC11263574; doi:10.1038/s41467-024-50414-w), 2024-07-22
Supplement: 41467_2024_50414_MOESM5_ESM.pdf [file 41467_2024_50414_MOESM5_ESM.pdf]

## Reporting Summary

Nature Portfolio wishes to improve the reproducibility of the work that we publish. This form provides structure for consistency and transparency in reporting. For further information on Nature Portfolio policies, see our [Editorial Policies](#) and the [Editorial Policy Checklist](#).

### Statistics

For all statistical analyses, confirm that the following items are present in the figure legend, table legend, main text, or Methods section.

- |                                     |                                                                                                                                                                                                                                                                                     |
|-------------------------------------|-------------------------------------------------------------------------------------------------------------------------------------------------------------------------------------------------------------------------------------------------------------------------------------|
| n/a                                 | Confirmed                                                                                                                                                                                                                                                                           |
| <input type="checkbox"/>            | <input checked="" type="checkbox"/> The exact sample size ( $n$ ) for each experimental group/condition, given as a discrete number and unit of measurement                                                                                                                         |
| <input type="checkbox"/>            | <input checked="" type="checkbox"/> A statement on whether measurements were taken from distinct samples or whether the same sample was measured repeatedly                                                                                                                         |
| <input type="checkbox"/>            | <input checked="" type="checkbox"/> The statistical test(s) used AND whether they are one- or two-sided<br><i>Only common tests should be described solely by name; describe more complex techniques in the Methods section.</i>                                                    |
| <input checked="" type="checkbox"/> | <input type="checkbox"/> A description of all covariates tested                                                                                                                                                                                                                     |
| <input type="checkbox"/>            | <input checked="" type="checkbox"/> A description of any assumptions or corrections, such as tests of normality and adjustment for multiple comparisons                                                                                                                             |
| <input checked="" type="checkbox"/> | <input type="checkbox"/> A full description of the statistical parameters including central tendency (e.g. means) or other basic estimates (e.g. regression coefficient) AND variation (e.g. standard deviation) or associated estimates of uncertainty (e.g. confidence intervals) |
| <input type="checkbox"/>            | <input checked="" type="checkbox"/> For null hypothesis testing, the test statistic (e.g. $F$ , $t$ , $r$ ) with confidence intervals, effect sizes, degrees of freedom and $P$ value noted<br><i>Give <math>P</math> values as exact values whenever suitable.</i>                 |
| <input checked="" type="checkbox"/> | <input type="checkbox"/> For Bayesian analysis, information on the choice of priors and Markov chain Monte Carlo settings                                                                                                                                                           |
| <input checked="" type="checkbox"/> | <input type="checkbox"/> For hierarchical and complex designs, identification of the appropriate level for tests and full reporting of outcomes                                                                                                                                     |
| <input checked="" type="checkbox"/> | <input type="checkbox"/> Estimates of effect sizes (e.g. Cohen's $d$ , Pearson's $r$ ), indicating how they were calculated                                                                                                                                                         |

*Our web collection on [statistics for biologists](#) contains articles on many of the points above.*

### Software and code

Policy information about [availability of computer code](#)

|                 |                                                                                                                                                                                                                                                                               |
|-----------------|-------------------------------------------------------------------------------------------------------------------------------------------------------------------------------------------------------------------------------------------------------------------------------|
| Data collection | FACSDiva V8.0.2 and V9.0.1, Zen 2.6 (Zeiss)                                                                                                                                                                                                                                   |
| Data analysis   | CellRanger v3.0.0 (10X Genomics), Python 3.9.7, Scanpy 1.9.1, Libra 1.0.0, Scikit-learn 1.5.3, clusterProfiler 3.16, QuPath 0.3.2, scVI 0.8.1<br>No custom algorithms or software was used. The software and libraries used for the analysis is referenced in the manuscript. |

For manuscripts utilizing custom algorithms or software that are central to the research but not yet described in published literature, software must be made available to editors and reviewers. We strongly encourage code deposition in a community repository (e.g. GitHub). See the Nature Portfolio [guidelines for submitting code & software](#) for further information.

### Data

Policy information about [availability of data](#)

All manuscripts must include a [data availability statement](#). This statement should provide the following information, where applicable:

- Accession codes, unique identifiers, or web links for publicly available datasets
- A description of any restrictions on data availability
- For clinical datasets or third party data, please ensure that the statement adheres to our [policy](#)

Single-cell RNA-seq data have been deposited at Figshare and are publicly available as of the date of publication (doi:10.6084/m9.figshare.22340140). Xenium in situ data has been deposited at Figshare and Zenodo and is available as of the date of publication (Figshare doi: 10.6084/m9.figshare.25975132; Zenodo

## Research involving human participants, their data, or biological material

Policy information about studies with [human participants or human data](#). See also policy information about [sex, gender \(identity/presentation\), and sexual orientation](#) and [race, ethnicity and racism](#).

|                                                                    |                                                                                                                                                                                                                                  |
|--------------------------------------------------------------------|----------------------------------------------------------------------------------------------------------------------------------------------------------------------------------------------------------------------------------|
| Reporting on sex and gender                                        | We have reported the number of human donors of each sex. We do not have information about their gender, thus none is reported. The raw data contain sex information.                                                             |
| Reporting on race, ethnicity, or other socially relevant groupings | We have no information about the race, ethnicity or other socially relevant groupings of the donors.                                                                                                                             |
| Population characteristics                                         | We have reported the age range of the donors from each of the three biobanks involved in the study. Specific age is specified in raw data.                                                                                       |
| Recruitment                                                        | We requested samples from donors that did not meet the diagnostic criteria for any neurodegenerative disease                                                                                                                     |
| Ethics oversight                                                   | Swedish Ethical Review Authority (Etikprövningsmyndigheten) ref. 2020-00341. Donors or their next-of-kin provided written informed consent for brain autopsy, and the study was approved by the review board of each brain bank. |

Note that full information on the approval of the study protocol must also be provided in the manuscript.

## Field-specific reporting

Please select the one below that is the best fit for your research. If you are not sure, read the appropriate sections before making your selection.

Life sciences  Behavioural & social sciences  Ecological, evolutionary & environmental sciences

For a reference copy of the document with all sections, see [nature.com/documents/nr-reporting-summary-flat.pdf](https://www.nature.com/documents/nr-reporting-summary-flat.pdf)

## Life sciences study design

All studies must disclose on these points even when the disclosure is negative.

|                 |                                                                                                                                                                                                                                                                                                                                                         |
|-----------------|---------------------------------------------------------------------------------------------------------------------------------------------------------------------------------------------------------------------------------------------------------------------------------------------------------------------------------------------------------|
| Sample size     | We obtained samples from 28 donors. The sample size was limited by the availability of fresh-frozen striatum samples and the scope of the project, yet we produced the largest snRNA-seq dataset of human striatal interneurons to date.                                                                                                                |
| Data exclusions | None of the samples were excluded from the study.                                                                                                                                                                                                                                                                                                       |
| Replication     | To verify the reproducibility of our findings, we reproduced our taxonomy using data from 4 datasets belonging to 3 previous studies. Besides the commonalities found after integrating the data, we show that the expression patterns which define the groups in our taxonomy can be observed in the raw, non-normalized data from published datasets. |
| Randomization   | Our study did not use experimental groups, therefore the samples were not randomized.                                                                                                                                                                                                                                                                   |
| Blinding        | Our study did not use experimental groups, therefore blinding was not considered necessary.                                                                                                                                                                                                                                                             |

## Behavioural & social sciences study design

All studies must disclose on these points even when the disclosure is negative.

|                   |     |
|-------------------|-----|
| Study description | N/A |
| Research sample   | N/A |
| Sampling strategy | N/A |
| Data collection   | N/A |
| Timing            | N/A |
| Data exclusions   | N/A |
| Non-participation | N/A |

Randomization

N/A

## Ecological, evolutionary & environmental sciences study design

All studies must disclose on these points even when the disclosure is negative.

Study description

N/A

Research sample

N/A

Sampling strategy

N/A

Data collection

N/A

Timing and spatial scale

N/A

Data exclusions

N/A

Reproducibility

N/A

Randomization

N/A

Blinding

N/A

Did the study involve field work?

 Yes No

## Field work, collection and transport

Field conditions

N/A

Location

N/A

Access &amp; import/export

N/A

Disturbance

N/A

## Reporting for specific materials, systems and methods

We require information from authors about some types of materials, experimental systems and methods used in many studies. Here, indicate whether each material, system or method listed is relevant to your study. If you are not sure if a list item applies to your research, read the appropriate section before selecting a response.

### Materials & experimental systems

### Methods

- n/a | Involved in the study
- Antibodies
  - Eukaryotic cell lines
  - Palaeontology and archaeology
  - Animals and other organisms
  - Clinical data
  - Dual use research of concern
  - Plants

- n/a | Involved in the study
- ChIP-seq
  - Flow cytometry
  - MRI-based neuroimaging

### Antibodies

Antibodies used

Millimark Mouse Anti-NeuN PE Conjugated, Clone A60 (Merck, identifier FCMAB317PE)

Validation

The antibody was validated by the supplier for use in flow cytometry for the detection of NeuN, using U251 cells.  
All further information can be found on the suppliers webpage:  
[https://www.merckmillipore.com/SE/en/product/Milli-Mark-Anti-NeuN-PE-Antibody-clone-A60,MM\\_NF-FCMAB317PE](https://www.merckmillipore.com/SE/en/product/Milli-Mark-Anti-NeuN-PE-Antibody-clone-A60,MM_NF-FCMAB317PE)

## Eukaryotic cell lines

Policy information about [cell lines and Sex and Gender in Research](#)

|                                                                      |     |
|----------------------------------------------------------------------|-----|
| Cell line source(s)                                                  | N/A |
| Authentication                                                       | N/A |
| Mycoplasma contamination                                             | N/A |
| Commonly misidentified lines<br>(See <a href="#">ICLAC</a> register) | N/A |

## Palaeontology and Archaeology

|                                                                                                                                                 |     |
|-------------------------------------------------------------------------------------------------------------------------------------------------|-----|
| Specimen provenance                                                                                                                             | N/A |
| Specimen deposition                                                                                                                             | N/A |
| Dating methods                                                                                                                                  | N/A |
| <input type="checkbox"/> Tick this box to confirm that the raw and calibrated dates are available in the paper or in Supplementary Information. |     |
| Ethics oversight                                                                                                                                | N/A |

Note that full information on the approval of the study protocol must also be provided in the manuscript.

## Animals and other research organisms

Policy information about [studies involving animals](#); [ARRIVE guidelines](#) recommended for reporting animal research, and [Sex and Gender in Research](#)

|                         |     |
|-------------------------|-----|
| Laboratory animals      | N/A |
| Wild animals            | N/A |
| Reporting on sex        | N/A |
| Field-collected samples | N/A |
| Ethics oversight        | N/A |

Note that full information on the approval of the study protocol must also be provided in the manuscript.

## Clinical data

Policy information about [clinical studies](#)

All manuscripts should comply with the ICMJE [guidelines for publication of clinical research](#) and a completed [CONSORT checklist](#) must be included with all submissions.

|                             |     |
|-----------------------------|-----|
| Clinical trial registration | N/A |
| Study protocol              | N/A |
| Data collection             | N/A |
| Outcomes                    | N/A |

## Dual use research of concern

Policy information about [dual use research of concern](#)

### Hazards

Could the accidental, deliberate or reckless misuse of agents or technologies generated in the work, or the application of information presented in the manuscript, pose a threat to:

- | No                       | Yes                                                 |
|--------------------------|-----------------------------------------------------|
| <input type="checkbox"/> | <input type="checkbox"/> Public health              |
| <input type="checkbox"/> | <input type="checkbox"/> National security          |
| <input type="checkbox"/> | <input type="checkbox"/> Crops and/or livestock     |
| <input type="checkbox"/> | <input type="checkbox"/> Ecosystems                 |
| <input type="checkbox"/> | <input type="checkbox"/> Any other significant area |

## Experiments of concern

Does the work involve any of these experiments of concern:

- | No                       | Yes                                                                                                  |
|--------------------------|------------------------------------------------------------------------------------------------------|
| <input type="checkbox"/> | <input type="checkbox"/> Demonstrate how to render a vaccine ineffective                             |
| <input type="checkbox"/> | <input type="checkbox"/> Confer resistance to therapeutically useful antibiotics or antiviral agents |
| <input type="checkbox"/> | <input type="checkbox"/> Enhance the virulence of a pathogen or render a nonpathogen virulent        |
| <input type="checkbox"/> | <input type="checkbox"/> Increase transmissibility of a pathogen                                     |
| <input type="checkbox"/> | <input type="checkbox"/> Alter the host range of a pathogen                                          |
| <input type="checkbox"/> | <input type="checkbox"/> Enable evasion of diagnostic/detection modalities                           |
| <input type="checkbox"/> | <input type="checkbox"/> Enable the weaponization of a biological agent or toxin                     |
| <input type="checkbox"/> | <input type="checkbox"/> Any other potentially harmful combination of experiments and agents         |

## Plants

|                       |                                  |
|-----------------------|----------------------------------|
| Seed stocks           | <input type="text" value="n/a"/> |
| Novel plant genotypes | <input type="text" value="n/a"/> |
| Authentication        | <input type="text" value="n/a"/> |

## ChIP-seq

### Data deposition

- Confirm that both raw and final processed data have been deposited in a public database such as [GEO](#).
- Confirm that you have deposited or provided access to graph files (e.g. BED files) for the called peaks.

|                                                                            |                                  |
|----------------------------------------------------------------------------|----------------------------------|
| Data access links<br><small>May remain private before publication.</small> | <input type="text" value="N/A"/> |
| Files in database submission                                               | <input type="text" value="N/A"/> |
| Genome browser session<br><small>(e.g. <a href="#">UCSC</a>)</small>       | <input type="text" value="N/A"/> |

### Methodology

|                         |                                  |
|-------------------------|----------------------------------|
| Replicates              | <input type="text" value="N/A"/> |
| Sequencing depth        | <input type="text" value="N/A"/> |
| Antibodies              | <input type="text" value="N/A"/> |
| Peak calling parameters | <input type="text" value="N/A"/> |
| Data quality            | <input type="text" value="N/A"/> |
| Software                | <input type="text" value="N/A"/> |

## Flow Cytometry

### Plots

Confirm that:

- The axis labels state the marker and fluorochrome used (e.g. CD4-FITC).
- The axis scales are clearly visible. Include numbers along axes only for bottom left plot of group (a 'group' is an analysis of identical markers).
- All plots are contour plots with outliers or pseudocolor plots.
- A numerical value for number of cells or percentage (with statistics) is provided.

### Methodology

Sample preparation

Nuclei were isolated from 100 – 150 mg of fresh frozen tissue using nuclease-free homogenization buffer (10 mM Tris (pH 8), 250 mM Sucrose, 25 mM KCl, 5 mM MgCl<sub>2</sub>, 0.1 mM DTT, 1x Protease inhibitor cocktail (50x in 100 % Ethanol, G6521, Promega), 0.2 U/μl RNasin Plus (N2615, Promega), 0.1 % Triton X-100) and a dounce tissue grinder with loose and tight pestle (20 strokes each, 357538, Wheaton). The nuclei were separated from debris using a Iodixanol gradient (OptiPrep Density Gradient Medium (D1556, Sigma) in 60 mM Tris (pH 8), 250 mM Sucrose, 150 mM KCl, 30 mM MgCl<sub>2</sub>) and incubated with NeuN antibody for 30 minutes (1:500, Millimark mouse anti-NeuN PE conjugated (FCMAB317PE, Merck) in nuclease-free blocking buffer (1x PBS, 1 % BSA, 0.2 U/μl RNasin Plus)). After removing the antibody, nuclei were resuspended in 500 μl blocking buffer and stained with DAPI (final concentration 0.05 mg/ml, (D3571, Invitrogen)).

Instrument

BD FACSAria Fusion Flow Cytometer  
BD FACSAria III Cell Sorter

Software

FACSDiva V8.0.2 and V9.0.1  
FlowJo 10.8.2

Cell population abundance

Samples were sorted until collecting 200000 NeuN positive and 200000 NeuN negative nuclei or until the entire sample was used.

Gating strategy

FSC-H versus DAPI-A was used to distinguish nuclei from debris, followed by FSC-H versus FSC-A to separate single nuclei from doublets. Finally PE-A versus DAPI-A was used to identify NeuN positive and NeuN negative nuclei and sort each fraction in a separate tube.

Tick this box to confirm that a figure exemplifying the gating strategy is provided in the Supplementary Information.

## Magnetic resonance imaging

### Experimental design

Design type

N/A

Design specifications

N/A

Behavioral performance measures

N/A

### Acquisition

Imaging type(s)

N/A

Field strength

N/A

Sequence & imaging parameters

N/A

Area of acquisition

N/A

Diffusion MRI

Used

Not used

### Preprocessing

Preprocessing software

N/A

Normalization

N/A

Normalization template

N/A

Noise and artifact removal

N/A

Volume censoring

N/A

**Statistical modeling & inference**

Model type and settings

N/A

Effect(s) tested

N/A

Specify type of analysis:  Whole brain  ROI-based  Both

Statistic type for inference

N/A

(See [Eklund et al. 2016](#))

Correction

N/A

**Models & analysis**

n/a | Involved in the study

  Functional and/or effective connectivity  Graph analysis  Multivariate modeling or predictive analysis

Functional and/or effective connectivity

N/A

Graph analysis

N/A

Multivariate modeling and predictive analysis

N/A
